# Supplementary material
Source: HighWire-hosted journal article supplement (https://bmjopen.bmj.com/content/14/7/e082912)
Supplement: inline-supplementary-material-1 [file inline-supplementary-material-1.pdf]

ONLINE SUPPLEMENT TO:

Core SocioDemographic data variables in ICU Trials (CoDe-IT): A protocol for generating core data variables using a Delphi consensus process

Table of Contents

Supplementary Table 1. Preferred Reporting Items for Systematic reviews and Meta-Analyses extension for Scoping Reviews (PRISMA-ScR) Checklist..... 2

Supplementary Table 2. MEDLINE search strategy..... 5

Supplementary Table 3. EMBASE search strategy ..... 6

Supplementary Table 4. CINAHL search strategy ..... 7

**Supplementary Table 1.** Preferred Reporting Items for Systematic reviews and Meta-Analyses extension for Scoping Reviews (PRISMA-ScR) Checklist

| SECTION                           | ITEM | PRISMA-ScR CHECKLIST ITEM                                                                                                                                                                                                                                                                                  | REPORTED ON PAGE # |
|-----------------------------------|------|------------------------------------------------------------------------------------------------------------------------------------------------------------------------------------------------------------------------------------------------------------------------------------------------------------|--------------------|
| <b>TITLE</b>                      |      |                                                                                                                                                                                                                                                                                                            |                    |
| Title                             | 1    | Identify the report as a scoping review.                                                                                                                                                                                                                                                                   | 1                  |
| <b>ABSTRACT</b>                   |      |                                                                                                                                                                                                                                                                                                            |                    |
| Structured summary                | 2    | Provide a structured summary that includes (as applicable): background, objectives, eligibility criteria, sources of evidence, charting methods, results, and conclusions that relate to the review questions and objectives.                                                                              | 3                  |
| <b>INTRODUCTION</b>               |      |                                                                                                                                                                                                                                                                                                            |                    |
| Rationale                         | 3    | Describe the rationale for the review in the context of what is already known. Explain why the review questions/objectives lend themselves to a scoping review approach.                                                                                                                                   | 5                  |
| Objectives                        | 4    | Provide an explicit statement of the questions and objectives being addressed with reference to their key elements (e.g., population or participants, concepts, and context) or other relevant key elements used to conceptualize the review questions and/or objectives.                                  | 6                  |
| <b>METHODS</b>                    |      |                                                                                                                                                                                                                                                                                                            |                    |
| Protocol and registration         | 5    | Indicate whether a review protocol exists; state if and where it can be accessed (e.g., a Web address); and if available, provide registration information, including the registration number.                                                                                                             | 6                  |
| Eligibility criteria              | 6    | Specify characteristics of the sources of evidence used as eligibility criteria (e.g., years considered, language, and publication status), and provide a rationale.                                                                                                                                       | 6                  |
| Information sources*              | 7    | Describe all information sources in the search (e.g., databases with dates of coverage and contact with authors to identify additional sources), as well as the date the most recent search was executed.                                                                                                  | 9                  |
| Search                            | 8    | Present the full electronic search strategy for at least 1 database, including any limits used, such that it could be repeated.                                                                                                                                                                            | 10, Table 1        |
| Selection of sources of evidence† | 9    | State the process for selecting sources of evidence (i.e., screening and eligibility) included in the scoping review.                                                                                                                                                                                      | 10-11, Table 2     |
| Data charting process‡            | 10   | Describe the methods of charting data from the included sources of evidence (e.g., calibrated forms or forms that have been tested by the team before their use, and whether data charting was done independently or in duplicate) and any processes for obtaining and confirming data from investigators. | 11-12              |

|                                                       |    |                                                                                                                                                                                                       |       |
|-------------------------------------------------------|----|-------------------------------------------------------------------------------------------------------------------------------------------------------------------------------------------------------|-------|
| Data items                                            | 11 | List and define all variables for which data were sought and any assumptions and simplifications made.                                                                                                | 11-12 |
| Critical appraisal of individual sources of evidence§ | 12 | If done, provide a rationale for conducting a critical appraisal of included sources of evidence; describe the methods used and how this information was used in any data synthesis (if appropriate). | 12    |
| Synthesis of results                                  | 13 | Describe the methods of handling and summarizing the data that were charted.                                                                                                                          | 12    |
| <b>RESULTS</b>                                        |    |                                                                                                                                                                                                       |       |
| Selection of sources of evidence                      | 14 | Give numbers of sources of evidence screened, assessed for eligibility, and included in the review, with reasons for exclusions at each stage, ideally using a flow diagram.                          | NA    |
| Characteristics of sources of evidence                | 15 | For each source of evidence, present characteristics for which data were charted and provide the citations.                                                                                           | NA    |
| Critical appraisal within sources of evidence         | 16 | If done, present data on critical appraisal of included sources of evidence (see item 12).                                                                                                            | NA    |
| Results of individual sources of evidence             | 17 | For each included source of evidence, present the relevant data that were charted that relate to the review questions and objectives.                                                                 | NA    |
| Synthesis of results                                  | 18 | Summarize and/or present the charting results as they relate to the review questions and objectives.                                                                                                  | NA    |
| <b>DISCUSSION</b>                                     |    |                                                                                                                                                                                                       |       |
| Summary of evidence                                   | 19 | Summarize the main results (including an overview of concepts, themes, and types of evidence available), link to the review questions and objectives, and consider the relevance to key groups.       | NA    |
| Limitations                                           | 20 | Discuss the limitations of the scoping review process.                                                                                                                                                | 4     |
| Conclusions                                           | 21 | Provide a general interpretation of the results with respect to the review questions and objectives, as well as potential implications and/or next steps.                                             | NA    |
| <b>FUNDING</b>                                        |    |                                                                                                                                                                                                       |       |
| Funding                                               | 22 | Describe sources of funding for the included sources of evidence, as well as sources of funding for the scoping review. Describe the role of the funders of the scoping review.                       | 16    |

JB1 = Joanna Briggs Institute; PRISMA-ScR = Preferred Reporting Items for Systematic reviews and Meta-Analyses extension for Scoping Reviews.

\* Where *sources of evidence* (see second footnote) are compiled from, such as bibliographic databases, social media platforms, and Web sites.

† A more inclusive/heterogeneous term used to account for the different types of evidence or data sources (e.g., quantitative and/or qualitative research, expert opinion, and policy documents) that may be eligible in a scoping review as opposed to only studies. This is not to be confused with *information sources* (see first footnote).

‡ The frameworks by Arksey and O'Malley (6) and Levac and colleagues (7) and the JBI guidance (4, 5) refer to the process of data extraction in a scoping review as data charting.

§ The process of systematically examining research evidence to assess its validity, results, and relevance before using it to inform a decision. This term is used for items 12 and 19 instead of "risk of bias" (which is more applicable to systematic reviews of interventions) to include and acknowledge the various sources of evidence that may be used in a scoping review (e.g., quantitative and/or qualitative research, expert opinion, and policy document).

*From:* Tricco AC, Lillie E, Zarin W, O'Brien KK, Colquhoun H, Levac D, et al. PRISMA Extension for Scoping Reviews (PRISMA ScR): Checklist and Explanation. *Ann Intern Med.* 2018;169:467–473. [doi: 10.7326/M18-0850](https://doi.org/10.7326/M18-0850).

**Supplementary Table 2.** MEDLINE search strategy

| Study setting                                                                                                                                                                                                                                                                                                                                                | Study region                                                                                                                                                                                                                                                                                                                                                                                                                                                                                                                                                                                                                                                                                                                                                                                                                                                                                                                                                                                                                                                                                                                                                                                                                                                                                                                                                          |
|--------------------------------------------------------------------------------------------------------------------------------------------------------------------------------------------------------------------------------------------------------------------------------------------------------------------------------------------------------------|-----------------------------------------------------------------------------------------------------------------------------------------------------------------------------------------------------------------------------------------------------------------------------------------------------------------------------------------------------------------------------------------------------------------------------------------------------------------------------------------------------------------------------------------------------------------------------------------------------------------------------------------------------------------------------------------------------------------------------------------------------------------------------------------------------------------------------------------------------------------------------------------------------------------------------------------------------------------------------------------------------------------------------------------------------------------------------------------------------------------------------------------------------------------------------------------------------------------------------------------------------------------------------------------------------------------------------------------------------------------------|
| 1. Critical care/ or Critical Illness/ or Intensive care/ or Intensive care units/ or Intensive care units, pediatric/<br>2. ((intensive or critical or acute) adj2 (care* or therap*)).tw,kf<br>3. (ICU* or GICU* or CCU* or PICU* or PCCU*).tw,kf<br>4. ((critical* or severe or catastrophic* or acute*) adj2 (ill* or sick* or ail*)).tw,kf<br>5. Or/1-4 | 6. exp canada/<br>7. (canad* or alberta or british columbia or colombie britannique or saskatchewan or manitoba or ontario or quebec or new brunswick or nouveau brunswick or nova scotia or nouvelle ecosse or prince edward island or ile du prince edward or PEI or newfoundland or terre neuve or labrador or nun\$V\$t or territoires du nord ouest or northwest territories or nwt or yukon or ontario).mp.<br>8. (edmonton or calgary or vancouver or victoria or prince george or kelowna or winnipeg or st* john?s or halifax or saint john or hamilton or waterloo or st catharines or sudbury or thunder bay or kingston or windsor or ottawa or toronto or mississauga or quebec city or montreal or trois?rivers or sherbrooke or chicoutimi or moncton or saskatoon or western university).tw,kf.<br>9. ("Children's Hospital of Winnipeg" or Janeway Child Health Centre or IWK or "McMaster Children's Hospital" or "Children's Hospital at London Health" or "Children's Hospital of Eastern Ontario" or CHEO or Holland Bloorview Kids or Hospital for Sick Children or Hotel Dieu Hospital Child Development Centre or Centre de readaptation Marie Enfant or Sainte-Justine or "Montreal Children's Hospital" or Centre Mere-Enfant or "Jim Pattison Children's Hospital").mp.<br>10. Or/6-8<br>11. 5 and 9<br>12. limit 11 to yr="2012 -Current" |

**Supplementary Table 3.** EMBASE search strategy

| Study setting                                                                                     | Study region                                                                                                                                                                                                                                                                                                                                                                                                                                                                    |
|---------------------------------------------------------------------------------------------------|---------------------------------------------------------------------------------------------------------------------------------------------------------------------------------------------------------------------------------------------------------------------------------------------------------------------------------------------------------------------------------------------------------------------------------------------------------------------------------|
| 1. intensive care/ or critical illness/ or intensive care unit/ or pediatric intensive care unit/ | 6. exp canada/                                                                                                                                                                                                                                                                                                                                                                                                                                                                  |
| 2. ((intensive or critical or acute) adj2 (care* or therap*)).mp                                  | 7. (canad* or alberta or british columbia or colombie britannique or saskatchewan or manitoba or ontario or quebec or new brunswick or nouveau brunswick or nova scotia or nouvelle ecosse or prince edward island or ile du prince edward or PEI or newfoundland or terre neuve or labrador or nun\$y\$ut or territoires du nord ouest or northwest territories or nwt or yukon or ontario).mp.                                                                                |
| 3. (ICU* or GICU* or CCU* or PICU* or PCCU*).mp                                                   | 8. (edmonton or calgary or vancouver or victoria or prince george or kelowna or winnipeg or st* john?s or halifax or saint john or hamilton or waterloo or st catharines or sudbury or thunder bay or kingston or windsor or ottawa or toronto or mississauga or quebec city or montreal or trois?rivi?res or sherbrooke or chicoutimi or moncton or saskatoon or western university).mp.                                                                                       |
| 4. ((critical* or severe or catastrophic* or acute*) adj2 (ill* or sick* or ail*)).mp             | 9. ("Children's Hospital of Winnipeg" or Janeway Child Health Centre or IWK or "McMaster Children's Hospital" or "Children's Hospital at London Health" or "Children's Hospital of Eastern Ontario" or CHEO or Holland Bloorview Kids or Hospital for Sick Children or Hotel Dieu Hospital Child Development Centre or Centre de readaptation Marie Enfant or Sainte-Justine or "Montreal Children's Hospital" or Centre Mere-Enfant or "Jim Pattison Children's Hospital").mp. |
| 5. Or/1-4                                                                                         | 10. Or/6-8                                                                                                                                                                                                                                                                                                                                                                                                                                                                      |
|                                                                                                   | 11. 5 and 9                                                                                                                                                                                                                                                                                                                                                                                                                                                                     |
|                                                                                                   | 12. limit 10 to yr="2012 -Current"                                                                                                                                                                                                                                                                                                                                                                                                                                              |

**Supplementary Table 4.** CINAHL search strategy

| Search ID # | Search terms                                                                                                                                                                                                                                                                                                                                                                         |
|-------------|--------------------------------------------------------------------------------------------------------------------------------------------------------------------------------------------------------------------------------------------------------------------------------------------------------------------------------------------------------------------------------------|
| S1          | MH critical care                                                                                                                                                                                                                                                                                                                                                                     |
| S2          | MH intensive care units+                                                                                                                                                                                                                                                                                                                                                             |
| S3          | critical care                                                                                                                                                                                                                                                                                                                                                                        |
| S4          | intensive care                                                                                                                                                                                                                                                                                                                                                                       |
| S5          | ICU                                                                                                                                                                                                                                                                                                                                                                                  |
| S6          | critical* ill*                                                                                                                                                                                                                                                                                                                                                                       |
| S7          | MH Canada+                                                                                                                                                                                                                                                                                                                                                                           |
| S8          | edmonton or calgary or vancouver or victoria or prince george or kelowna or winnipeg or st* john#s or halifax or saint john or hamilton or waterloo or st catharines or sudbury or thunder bay or kingston or windsor or ottawa or toronto or mississauga or quebec city or montreal or trois#rivers or sherbrooke or chicoutimi or moncton or saskatoon or western university       |
| S9          | canad* or alberta or british columbia or colombie britannique or saskatchewan or manitoba or ontario or quebec or new brunswick or nouveau brunswick or nova scotia or nouvelle ecosse or prince edward island or ile du prince edward or PEI or newfoundland or terre neuve or labrador or nun#v#t or territoires du nord ouest or northwest territories or nwt or yukon or ontario |
| S10         | S1 or S2 or S3 or S4 or S5 or S6                                                                                                                                                                                                                                                                                                                                                     |
| S11         | S7 or S8 or S9                                                                                                                                                                                                                                                                                                                                                                       |
| S12         | S10 and S11 ( <b>Limiters</b> - Publication Date: 20120101-20230231)                                                                                                                                                                                                                                                                                                                 |
